# 1 **Algorithmic Assessment of Missense Mutation Severity in** 2 **the Von-Hippel Lindau Protein**

3  
4 Francisco R. Fields<sup>1,2</sup>, Niraja Suresh<sup>1,2</sup>, Morgan Hiller<sup>1,2</sup>, Stefan D. Freed<sup>1,2,3#</sup>, Kasturi Haldar<sup>1,2</sup>,  
5 Shaun W. Lee <sup>1,2,3,4\*</sup>

6  
7 <sup>1</sup> Boler-Parseghian Center for Rare and Neglected Diseases, University of Notre Dame, Galvin  
8 Hall, Notre Dame, IN 46556, USA.

9 <sup>2</sup>Department of Biological Sciences, University of Notre Dame, Galvin Hall, Notre Dame, IN  
10 46556, USA.

11 <sup>3</sup>Chemistry-Biology-Biochemistry Interfaces, University of Notre Dame, McCourtney Hall,  
12 Notre Dame, IN 46556, USA

13 <sup>4</sup>Eck Institute for Global Health, University of Notre Dame, Brownson Hall, Notre Dame, IN  
14 46556, USA

15  
16 #Current address Elanco, 2500 Innovation Way, Greenfield, IN 46104, USA

17 \* Correspondence should be given to Shaun W. Lee ([lee.310@nd.edu](mailto:lee.310@nd.edu))

18 Keywords:

19

## 20 **Abstract**

21 Von Hippel-Lindau disease (VHL) is an autosomal dominant rare disease that causes the  
22 formation of angiogenic tumors. When functional, pVHL acts as an E3 ubiquitin ligase that  
23 negatively regulates hypoxia inducible factor (HIF). Genetic mutations that perturb the structure  
24 of pVHL result in dysregulation of HIF, causing a wide array of tumor pathologies including  
25 retinal angioma, pheochromocytoma, central nervous system hemangioblastoma, and clear cell  
26 renal carcinoma. These VHL-related cancers occur throughout the lifetime of the patient,  
27 requiring frequent intervention procedures, such as surgery, to remove the tumors. Although  
28 VHL is classified as a rare disease (1 in 39,000 to 1 in 91,000 affected) there is a large  
29 heterogeneity in genetic mutations listed for observed pathologies. Understanding how these  
30 specific mutations correlate with the myriad of observed pathologies for VHL could provide  
31 clinicians insight into the potential severity and onset of disease. Using a set of 285 ClinVar  
32 mutations in VHL, we developed a multiparametric scoring algorithm to evaluate the overall  
33 clinical severity of missense mutations in pVHL. The mutations were assessed according to eight  
34 weighted parameters as a comprehensive evaluation of protein misfolding and malfunction.  
35 Higher mutation scores were strongly associated with pathogenicity. Our approach establishes a  
36 novel *in silico* method by which VHL-specific mutations can be assessed for their severity and  
37 effect on the biophysical functions of the VHL protein.

## 38 **Introduction**

39 Von Hippel-Lindau (VHL) disease is an autosomal-dominant hereditary disease  
40 associated with the development of multiple angiogenic tumor types. This includes clear cell  
41 renal carcinoma (ccRCC), retinal angioma (RA), central nervous system hemangioblastoma  
42 (CHB), and pheochromocytoma (PCC)(1,2). The presence or absence of PCC divides VHL

43 disease into type 1 or type 2. Type 2 VHL is further subdivided into three subtypes depending on  
44 the appearance of other cancers: type 2A, PCCs but no ccRCCs, type 2B, PCCs and ccRCCs, or  
45 type 2C, PCCs only(1). While this allows for some preliminary genotype-phenotype  
46 associations, a patient's association with a specific subtype alternates as different cancers arise  
47 throughout their lifetime(1).

48 Patients with VHL disease have a single mutation in one allele of the *VHL* gene(3). Upon  
49 spontaneous inactivation of the second allele, tumor development can initiate, making the loss of  
50 heterozygosity (LOH) a crucial step in the development of VHL disease(1,4,5). The *VHL* gene  
51 encodes two protein products, both of which exhibit equivalent activity: the 30kDa isoform  
52 (pVHL<sub>30</sub>) and the more common 19kDa isoform (pVHL<sub>19</sub>) found in most tissues (6,7). pVHL  
53 forms a complex with elongin B (EloB) and elongin C (EloC) for the VCB complex(8–10). This  
54 stabilizes EloB, EloC, and pVHL, making them resistant to proteosomal degradation; however,  
55 upon mutation of pVHL, contacts with EloB and C become disrupted, making pVHL unstable  
56 and a target for degradation(9,11,12). VCB then complexes with cullin 2 (Cul2) and the RING  
57 finger protein RBX1 to form the VCB-CR complex(9). This complex functions as an E3  
58 ubiquitin ligase, targeting a variety of proteins for degradation by the proteasome(13–15).

59 HIF $\alpha$  is ubiquitinated by the VCB-CR complex for degradation by the  
60 proteasome(2,13,16). HIF is involved in cellular oxygen sensing and regulates the expression of  
61 angiogenic genes making it a key player in the development of the vascularized tumor  
62 pathologies associated with VHL disease(16,17). Under normoxic conditions, HIF-1 $\alpha$  is  
63 hydroxylated on two proline residues allowing for interaction with pVHL and its subsequent  
64 ubiquitination by the VCB-CR complex(2,16). In hypoxic conditions, HIF-1 $\alpha$  is not  
65 hydroxylated, preventing negative regulation by pVHL. Under these conditions, active HIF1 $\alpha$

66 subsequently drives the expression of hypoxia associated genes. Loss of functional pVHL allows  
67 aberrant expression of HIF target genes, such as vascular endothelial growth factor, contributing  
68 to the development of VHL associated angiogenic tumors (18–20).

69         Regardless of VHL subtype, patients are at a lifetime risk for the development of tumors  
70 with the age of onset of VHL disease ranging from 20 to 40 years old(21). Clinical diagnosis of  
71 VHL disease is dependent upon the familial history of VHL. Patients with a family history of  
72 VHL must present with CHB, PCC, or ccRCC; however, if there is no family history of disease,  
73 patients must then present with two more CHBs or a CHB and a visceral tumour, such as  
74 ccRCC(1,2,21). Genetic testing is conducted for presymptomatic detection of VHL for patients  
75 with a family history of disease(22). Surveillance, which varies since there are many tissue types  
76 in which the VHL tumors and cysts can arise, includes ophthalmologic evaluation and CT or  
77 MRI scans(21,23). Similar to surveillance, treatment is also varied due to the breadth of tumor  
78 types and includes surgery, radiation, or chemotherapies(21,23).

79         Multiple studies have investigated the association of mutation types to the VHL subtypes;  
80 however, there is still heterogeneity associated with the phenotypes of missense mutations(24–  
81 26). While loss-of-function mutations cause global disruption of the VHL protein, missense  
82 mutations may only affect certain interaction partners and cellular pathways involving  
83 pVHL(27). A recent study completed by Razafinjatovo et al used an *in silico* approach to  
84 determine the thermodynamic stability of a given pVHL mutation(28). It was determined that the  
85 most thermodynamically unstable missense mutations resulted in pathogenic disease via global  
86 destabilization of pVHL and stabilization of HIF. This suggests that while some VHL missense  
87 mutations might only affect specific functions of the protein, others cause global misfolding and  
88 destabilization of the protein. A comprehensive examination of the effects of a given missense

89 mutation for pVHL can provide significant insight into how a given patient mutation can be  
90 predictive of disease severity; however, a systematic examination of the role of a given missense  
91 mutation (and subsequent amino acid replacement) must take into account multiple factors:  
92 secondary structure, thermodynamic stability, binding partners, translation rate, among other  
93 biophysical and biochemical properties. Providing a predictive scale of the phenotypic severity  
94 of a given missense mutation using *in silico* evaluation can potentially inform clinicians to  
95 develop tailored screening and surveillance strategies for each patient. Currently, some online  
96 databases provide investigators with basic information on the pathogenicity of a given mutation  
97 in genetic diseases, including VHL. *ClinVar* provides basic annotation on the pathogenicity of  
98 curated mutations according to the American College of Medical Genetics and Genomics  
99 (ACMG)(29,30). These guidelines provide a spectrum of pathogenicity descriptors for mendelian  
100 genetic diseases. Within these guidelines, mutations annotated as “pathogenic” or “likely  
101 pathogenic” have a greater than 90% certainty of a given gene variant being disease causing(30).  
102 Leveraging these sources of phenotypic information can help train and refine predictive  
103 algorithms for the assessment of missense mutation severity. Previously, we developed a  
104 computational, multiparametric approach to evaluate the biophysical consequences of missense  
105 mutations on the structure and stability of the Mucopolysaccharidosis Type IIIA (Sanfilippo  
106 Syndrome) protein (MPSIIIA). Severe mutations identified through our scoring approach  
107 correlated to a higher clinical severity of Sanfilippo Syndrome(31). We observed that mutations  
108 more deleterious to overall enzyme folding and function were correlated to more severe disease  
109 outcomes and a higher multiparametric algorithm scores(31). In this study we created an  
110 advanced weighted-score multiparametric approach to validate the use of a computational  
111 algorithm to assess the potential disease severity of genetic missense mutations in pVHL. We

112 focused not only on mutations that can affect the overall proteostasis of pVHL, but also noted the  
113 specific mutations that would impact VHL-specific functional properties (27,28,32). Our  
114 multiparametric algorithm for VHL included a set of eight biophysical parameters with  
115 individually weighted scores that gave an overall assessment of the ability of a given missense  
116 mutation in VHL to result in protein impairment: 1. aggregation propensity; 2. protein-protein  
117 interactions; 3. secondary structure; 4. conformational flexibility; 5. solvent accessibility; 6.  
118 protein stability; 7. post-translational modifications, and 8. translational rate(9,14,17,31).

## 119 **Materials and Methods**

### 120 *Mutation sets*

121 A set of 285 missense mutations in the human VHL gene, arising from a single  
122 nucleotide polymorphism (SNP) was acquired from ClinVar(29) (Supplemental File 2). An  
123 additional set of 1380 mutations was generated to represent all possible theoretical missense  
124 mutations (APMM) of VHL from a SNP (Supplemental File 1). Finally, hot spot mutations and  
125 mutation lists associated with different pathogenic outcomes were selected from the  
126 literature(25,28,32–34) (Supplemental File 3). A total of 1665 mutations were therefore used in  
127 our multiparametric analysis.

### 128 *Structures used in Analysis*

129 The VHL crystal structure in complex with EloB, EloC, and Cul2 was used in Parameters  
130 2, 3, 5, and 6 (1VCB)(35). Crystal structures in complex with HIF-1a were also used to develop  
131 Parameter 2 (1LM8, 4WQO)(9,36). The unstructured N-terminus of VHL is missing from  
132 published crystal structures; therefore, to assess the effect of mutations in this region for their  
133 effects on protein stability, ITASSER was used to generate a putative structure of VHL as input  
134 for Parameter 6(37).

135 ***Parameters for Algorithmic Assessment***

136 **Parameter 1: Aggregation Propensity:** Aggregation propensity was calculated as previously  
137 described(31). A positive aggregation score was assigned if a given mutation enhanced the  
138 hydrophobic character and aggregation propensity of the VHL polypeptide chain. *AGGRESCAN*  
139 was used to assess the individual contributions of an amino acid change on the overall  
140 hydrophobicity and propensity for aggregation(38).

141 **Parameter 2: Protein-Protein Interactions:** VHL functions as an E3 ubiquitin ligase when  
142 bound to HIF, EloB, EloC, and Cul2(9,10,18,39). To assess the capacity of missense mutation to  
143 disrupt these crucial interactions, mutations occurring at positions found to mediate protein  
144 interactions with known binding partners were scored positive.

145 **Parameter 3: Secondary Structure:** VHL consists of three structural domains: an N-terminal  
146 random coil region, a beta sheet containing  $\beta$ -domain, and an alpha helical  $\alpha$ -domain.  
147 Maintaining the secondary structural elements in this region are crucial for pVHL function as  
148 pathogenic mutations are less likely to occur in other disordered regions of the protein(28,32). If  
149 a missense mutation occurred in a region of secondary structure, it was scored positive for this  
150 parameter.

151 **Parameter 4: Conformational Flexibility:** Flexibility allows a protein molecule to perform its  
152 function and bind to substrates and interaction partners(40). The overall flexibility of a given  
153 protein is governed by the location of key amino acids within the amino acid sequence. The  
154 unique conformational constraint of the proline side chain and the ability to accommodate a *cis*-/  
155 *trans*-conformation in proteins makes proline a significant contributor to overall protein  
156 flexibility and function(41,42). Glycine residues contain a side chain that prevents steric  
157 hindrance, increasing the flexibility of a protein(43,44). Finally, cysteine residues are capable of

158 disulfide bonds, which are crucial components of protein stability(45,46). In this analysis, any  
159 missense mutation involving changes in proline, glycine, or cysteine residues were scored as  
160 positive.

161 **Parameter 5: Solvent Accessibility:** Replacing surface exposed hydrophilic residues with  
162 hydrophobic residues or charged residues with uncharged residues and vice versa can increase  
163 the probability of effects on protein-protein interaction and overall protein aggregation(46). In  
164 addition, substitution of hydrophobic amino acids for hydrophilic ones within the core of the  
165 protein can be thermodynamically unfavorable(47). Finally, the position of charged residues  
166 within the protein can be crucial for intramolecular salt bridge formation. Deleterious mutations  
167 could destabilize these interactions, thereby destabilizing the protein(48). If a mutation reversed  
168 or removed a charge at a given position, replaced a buried hydrophobic residue with a  
169 hydrophilic residue, or resulted in a surface exposed hydrophilic residue becoming hydrophobic,  
170 it was scored as positive in this parameter.

171 **Parameter 6: Protein Stability:** Proteins have evolved to fold into specific structures in order to  
172 perform their roles in the crowded environment of the cell. We evaluated the effects of missense  
173 mutations on the stability of pVHL as destabilizing mutations could prevent proper folding and  
174 function. *In vivo* protein folding relies on both thermodynamic and kinetic stability(49,50). The  
175 difference in the energy states of the unfolded and that native protein is the thermodynamic  
176 stability while kinetic stability refers to the energy barriers that separate any two states of a  
177 protein(49,51–54). A missense mutation can alter both the thermodynamic and kinetic stability  
178 of a protein indicating a biophysical cause for disease. To determine if overall protein stability  
179 was altered via a missense mutation, pVHL missense mutations were assessed using the



180 CUPSAT online prediction server(49). Missense mutations that resulted in a  $-\Delta\Delta G$ , i.e.,  
181 indicating significant changes in overall protein stability, were scored as positive(49).

182 **Parameter 7: Post-translational Modifications (PTMs)**: Post-translational modifications serve  
183 crucial roles on proteins through the covalent addition of small molecules to protein  
184 backbones(55). PTMs confer additional specificity to the overall structure and function of a  
185 given protein, and contribute to the ability of a protein to interact with different binding  
186 partners(55–57). To assess the specific roles of PTMs in our algorithmic assessment of VHL  
187 disease, missense mutations that occurred at a position known to be post-translationally modified  
188 were positively scored(32).

189 **Parameter 8: Translation Rate**: A change in the translation rate of a protein can have  
190 deleterious effects on folding(58,59). Translation rate is dependent on the codon usage  
191 percentage and the number of rare versus common codons in the gene and the subsequent  
192 abundance of the corresponding tRNA species. A mutation was scored in this parameter if the  
193 mutation change resulted in a translation rate fold change exceeding +2 or -2. Translation rate  
194 was calculated using the codon usage tables and tRNA abundances at GtRNAdb(60).

### 195 ***Overall Score***

196 The overall score given to the multiparametric assessment of each gene mutation was  
197 calculated as a sum of the unweighted or weighted scores as described previously(31).

### 198 ***Parameter Independence and Weighting Strategy***

199 Parameters were tested for independence from one another using Spearman's rho  
200 correlation in R. Parameters with rho values  $< .5$  and  $> -.5$  were considered not correlated  
201 (Supplemental Table 1). To determine an optimized strategy for weighting score values for each  
202 of the parameters, 211 ClinVar mutations were used with their corresponding pathogenicity

203 indicators to develop a pathogenicity index. ClinVar mutations annotated as benign, uncertain  
204 significance, or conflicting interpretations were considered “benign” and given a pathogenicity  
205 score of 0. Those annotated as likely pathogenic or pathogenic were considered “pathogenic” and  
206 given a score of 2. Symphony, an online program to predict the risk of ccRCC in a given VHL  
207 mutation, was also used to develop the pathogenicity index by scoring the same 211 ClinVar  
208 mutations. Mutations identified as high risk of ccRCC were given a score of 1 while those  
209 identified as low risk were given a score of 0. The scores were summed for each mutation,  
210 creating a pathogenicity index ranging for 0 to 3 for each of the 211 ClinVar mutations. A chi-  
211 square was used to test for dependence of the pathogenicity index score to the unweighted scores  
212 of each parameter using R. The resulting p-values were used to set the following cut-offs for our  
213 weighting approach.  $P < .005$  was weighted 4.  $.005 < P < .05$  was weighted 3.  $.05 < P < .5$  was  
214 weighted 2. Finally,  $P > .5$  was unweighted (i.e. score of 1) (Supplemental Table 2).

### 215 *Statistical Analysis*

216 All statistical analysis was conducted using GraphPad Prizm (Supplemental File 4).  
217 Spearman's rho and Chi-square tests were performed in R (Supplemental Tables 1 & 2).

### 218 **Results**

219 Using a set of 285 missense mutations from the ClinVar database and another set of 1380  
220 possible missense mutations (APMM) in pVHL, we began to evaluate the consequences of  
221 missense mutations, arising from a SNP. Our multiparametric approach provided a holistic view  
222 of the consequences of a mutation on the overall structure and stability of pVHL by evaluating  
223 the following parameters: aggregation propensity, protein-protein interactions, secondary  
224 structure, conformational flexibility, solvent accessibility, protein stability, post-translational  
225 modification, and translational rate.

## 226 *Unweighted Scores for all possible mutations and the ClinVar dataset*

227           Using our initial, unweighted approach, in which a scored mutation received a 1 and an  
228           unscored mutation received a 0, we obtained a range of values for all missense mutation from 0  
229           to 7 for both the APMM and the ClinVar data sets, indicating no single mutation received a score  
230           in all of the 8 parameters (Supplemental Figure 1). Using the ClinVar data set, all of the  
231           parameters were determined to be independent of one another (Supplemental Table 1). The  
232           average score of the APMM and the ClinVar data sets were 2.7 and 2.8, respectively  
233           (Supplemental File 4). Our unweighted approach did not result in significant separations in the  
234           benign and pathogenic mutations (means of 2.46 and 3.59, respectively); therefore, we next  
235           evaluated the scores using a weighted approach (Supplemental Figure 2A and Supplemental File  
236           4).

## 237 *Weighted Scoring Approach*

238           In order to improve our strategy for the algorithmic assessment of missense mutations, a  
239           weighting strategy was developed using the pathogenicity indications available on ClinVar and  
240           Symphony, an online predictor of ccRCC risk of mutations in VHL. This pathogenicity index  
241           was tested for dependence against the unweighted parameters using the chi-square statistic.  
242           Weights were then assigned to the parameters according to their resulting p-value (Supplemental  
243           Table 2). This new scoring approach resulted in a range of scores from 0 to 20 for both the  
244           APMM and the ClinVar data sets with means of 8.3 and 8.5, respectively (Figure 1 A-B and  
245           Supplemental File 4). These populations were not found to be significantly different from one  
246           another by a Kolmogorov Smirnov test ( $P = .91$ ) (Figure 1C). Upon comparing the benign  
247           ClinVar mutations to the pathogenic ClinVar mutations, we observed a significant shift in the  
248           mean score from 7.2 to 11.0 respectively (Supplemental Figure 2B and Supplemental File 4).

249 This was determined to be a significant difference according to a t-test with a  $p < .05$  (Figure  
250 1D). This ClinVar set was further subdivided into its original ClinVar pathogenicity indications.  
251 All of the pathogenic groups (likely pathogenic, likely pathogenic/pathogenic, and pathogenic  
252 annotation) showed significant separation from the mutations of uncertain significance  
253 (Supplemental Figure 3A). Symphony was also used to determine the risk of ccRCC associated  
254 with the ClinVar mutations used in our pathogenicity index. When comparing the risk of ccRCC  
255 for the ClinVar mutations, we observed a significant difference in the algorithm score between  
256 the mutations identified as high risk (mean score of 10.5) and those identified as low risk (mean  
257 score of 7.6) (Supplemental Figure 3B). Our approach to refine the weights of each parameter  
258 therefore, was successful in distinguishing populations of pathogenic mutations and benign  
259 mutations from those databases listed.

#### 260 *Algorithm scores according to location within VHL 3-D structure*

261 VHL consists of three structural domains: an N-terminal random coil region, a beta sheet  
262 containing  $\beta$ -domain, and an alpha helical  $\alpha$ -domain. Pathogenic mutations have been observed  
263 to occur at a lower frequency in areas of disorder; therefore, maintaining this arrangement of  
264 secondary structure motifs is predicted to be critical for functional pVHL(28,32). We therefore  
265 predicted that we should also observe higher algorithm scores in mutations that occur in areas of  
266 defined secondary structure. Indeed, mean algorithm scores were significantly higher in regions  
267 of helix or sheet compared to random coil regions of the VHL protein (Figure 2A). Overall  
268 secondary structure dictates the division of pVHL into three main domains: the  $\alpha$ -domain, the  $\beta$ -  
269 domain, and the N-terminal coil region(32). We determined that mutations scored higher if they  
270 occurred in the  $\alpha$  and  $\beta$  domains compared to the N-terminus (Figure 2B).

271 VHL also consists of five binding interfaces(32,61,62). Interface A is involved in VCB  
272 complex formation(9). The HIF-1 $\alpha$  binding site is located within interface B(36,39). Cul2  
273 interacts with interface C(32,39). The unstructured N-terminus of VHL is proposed as interface  
274 D, though little is known of its binding partners and their importance in the progression of VHL  
275 disease(8,32). However, there are residues in interface D that are candidates for phosphorylation  
276 by aurora kinase II and casein kinase II(8,32). Finally, interface E, consisting of the helical C-  
277 terminus, is predicted to interact with Zinc-finger protein 197 (ZNF-197) and Von-Hippel  
278 Lindau Binding Protein 1 (VBP1), a protein chaperone(8,32,63). Due to the importance of each  
279 VHL protein interface (A,B,C) in the ubiquitin ligase function of VHL and subsequent HIF  
280 regulation by VHL, we expected to observe higher average algorithm scores for mutations  
281 occurring within these interfaces (2,39,64,65). When the mean algorithm scores for each of the  
282 binding interfaces were compared, we observed significantly higher scores within interface A  
283 compared to interfaces C, D, and E (Figure 2C). Interfaces B and C, important binding surfaces  
284 for HIF and Cul2 respectively, also had significantly higher algorithm scores than interfaces D  
285 and E, which are not involved in VCB complex formation (Figure 2C).

286 Recent studies into the distribution of mutations within the VHL structure have observed  
287 that amino acid changes occurring on the surface of the pVHL are more deleterious for overall  
288 function(32,33). These corresponding deleterious genetic mutations are associated with a higher  
289 risk of pheochromocytoma (PCC), a cancer of the adrenal glands that causes hormone  
290 dysregulation(2,32,33). To determine if these mutations are detected by our algorithmic scoring  
291 method, we compared the average algorithm score for mutations at the protein surface and  
292 mutations in the protein core (33). Since VHL functions as a scaffold for the assembly of the  
293 VCB complex, we would expect that mutations occurring on the surface of the protein, and

294 therefore affecting the binding sites for interaction partners, would result in higher algorithm  
295 scores and more severe disease. The p-value ( $p=.06$ ) indicated that the algorithm scores for  
296 comparing the surface versus core-located mutations approached significance at the  $.05$   $\alpha$ -value,  
297 suggesting that the observed trend towards a higher algorithm score (mean score = 13.2) in the  
298 surface mutations versus mutations occurring deeper in the VHL structure (mean score = 10.4)  
299 may have biological importance (Figure 2D). However, additional data and sampling of  
300 mutations appropriate for these regional comparisons are needed to improve the statistical score.

### 301 ***Identification of highly destabilizing and hot spot VHL mutations with algorithmic assessment***

302 We investigated the capacity of our algorithm to identify mutations that have been  
303 described as highly destabilizing to VHL(28). Razafinjatovo et al identified W117 and L184 as  
304 missense mutation hotspots that can highly destabilize pVHL(28). Our multiparametric  
305 algorithm approach also scored mutations at these residues considerably higher than the  
306 pathogenic mean score of 11 (mean score for APMM at W117 = 12.86 and mean score for  
307 APMM at L184 = 14.83), both above the average score for the pathogenic ClinVar mutations  
308 (Table 1). Other VHL mutation hot spots, such as L158 and N78 (scores of 13.0 and 16.3,  
309 respectively), also scored highly above the average for pathogenic ClinVar mutations; however,  
310 R167, another annotated VHL hotspot, received a below average pathogenic score (9.6) (Table  
311 2). Finally, other hotspot mutations, such as Y98 (mean score of 6.8), scored below average for  
312 benign scores. Our multiparametric scoring algorithm is designed to provide an evaluative sum  
313 of how a given missense mutation will affect the ability of a protein to fold and function  
314 properly. In this way, pathogenic mutations such as Y98, with low algorithm scores may not  
315 ultimately cause disease phenotypes by destabilizing pVHL protein, but through a more direct  
316 local effect that is critical for VHL function and protein interaction. This is likely the case for

317 Y98, located in binding interface B, which is crucial for interaction with HIF $\alpha$ (39,66).  
318 Therefore, mutations at these positions (Y98 mutations all score in parameter 2) are sufficient to  
319 cause disease through their ability to uniquely affect protein-protein interactions (Table 2). Other  
320 studies have found that specific mutations at the Y98 position will cause different VHL cancer  
321 phenotypes with Y98H causing type 2B disease and Y98N causing type 2A disease by  
322 modulating the efficacy of binding to HIF $\alpha$ (18). Although these kinds of critical mutations  
323 (crucial binding site, catalytic abatement, posttranslational substrate) should be taken into  
324 account independently from our algorithm, the use of our algorithm scores *combined* with these  
325 additional considerations will serve as a valuable comprehensive evaluation for the protein.

### 326 ***VHL missense mutations score and onset of VHL related cancers***

327       Next, we assessed if our algorithm would be able to identify missense mutations that are  
328 more likely to be associated with an early age of onset of VHL-related pathologies. Using  
329 published data sets of missense mutations from Chinese patients (available in Peng et al) and  
330 another dataset of English patients (available in Ong et al), we compared the algorithm score for  
331 56 missense mutations in early (less than 30 years old) to late (greater than 30 years old) onset of  
332 pheochromocytoma (PCC), central nervous system hemangioblastoma (CHB), retinal angioma  
333 (RA), and clear cell renal carcinoma (ccRCC)(25,33). For PCC, we observed a shift towards a  
334 higher average algorithm score for mutations associated with an early age of onset (11.5) than  
335 mutations with a later age of onset (9.1); however, this difference was not statistically significant  
336 ( $p = .1653$ ) (Figure 3A). Similar to PCC, algorithm scores trended towards higher values for  
337 early onset of CHB with mean score of 11.9 versus late onset of CHB with a mean score of 10.0;  
338 however, this was not a statistically significant difference ( $p = .0889$ ) (Figure 3B). However, we  
339 did see significant differences for the onset of RA and ccRCC (Figure 3C-D). For RA, early

340 onset mutations had an average algorithm score of 11.8 while late onset scores had an average  
341 algorithm score of 8.5 (Figure 3C). For ccRCC, early onset mutations had an average algorithm  
342 score of 13.1 while late onset mutations had an average algorithm score of 10.1 (Figure 3D).

343         These data indicate that our algorithm can distinguish more pathogenic mutations from  
344 less pathogenic ones that are based on age-related onset of different VHL related cancer types.  
345 While not significant at the  $\alpha$ -value cut-off at .05, the scores for early age of onset for both PCC  
346 and CHB trended towards higher values than the later age of onset. For ccRCC and PA, the  
347 scores for early onset versus the scores late onset were significantly higher at  $\alpha$ -value cut off of  
348 .05. Larger patient datasets from similar studies could be used to further refine our algorithm,  
349 and determine significance for both PCC and CHB disease types. Our analysis provide  
350 significant support for the use and refinement of *in silico* evaluation of *VHL* mutations and their  
351 capacity for large scale protein dysfunction to predict pathogenic outcomes.

352

### 353 **Discussion and Conclusions**

354         Von Hippel-Lindau (VHL) disease is an autosomal dominant hereditary disease that  
355 causes a variety of highly vascularized tumors in patients(67,68). While the average life  
356 expectancy is around 65 years of age, secondary conditions of tumor development such as  
357 blindness or neurological complications can be debilitating. Should these complications go  
358 undiagnosed and subsequently untreated, VHL becomes a fatal condition(1,23). Genetic  
359 diagnosis of VHL disease provides an early detection method for clinicians to begin surveillance.  
360 Computational and biophysical approaches aimed at predicting the severity of a mutation and its  
361 deleterious consequences on the function of pVHL can contribute additional information on how  
362 the disease might progress. We have provided a multiparametric algorithmic approach to



363 evaluate the severity of missense mutations in *VHL*. pVHL functions as a scaffold for the  
364 creation of the E3 ubiquitin ligase complex for proper regulation of HIF; therefore, our  
365 comprehensive evaluation of pVHL misfolding and dysfunction provides a structurally and  
366 molecularly informed approach to the prediction of mutation severity.

367 Our approach was able to distinguish between the populations of benign and pathogenic  
368 ClinVar mutations (Figure 1D and Supplemental Figure 2B). We also observed significantly  
369 higher algorithm scores for those mutations deemed high risk of ccRCC by Symphony  
370 (Supplemental Figure 3B). Taken together, our multiparameteric algorithm can be used to  
371 identify pathogenic from benign mutations in pVHL.

372 pVHL functions as a scaffold for the assembly of the VCB-CR complex(9). Perturbations  
373 to its secondary structure and binding capacity can have deleterious effects on the function of  
374 this complex, primarily the negative regulation of HIF under normoxia(2,13,16). The N-terminal  
375 tail of pVHL is only present in the pVHL30 isoform, with mutations occurring in this region  
376 being mostly ranked as clinically benign(32,61). Our algorithm scores also demonstrated  
377 significantly lower scores for mutations occurring in the N-terminus compared to the  $\alpha$ - or  $\beta$ -  
378 domains of the protein (Figure 2B). The N-terminus is predicted to exist as an  
379 unstructured/random coil region; therefore, we expected lower average algorithm scores for  
380 mutations occurring in the coil regions of pVHL (Figure 2A). Finally, the N-terminus includes  
381 binding interface D, one of the five binding interfaces of pVHL, which is not known to interact  
382 with proteins crucial for the regulation of HIF (8,32,61). Similar to the N-terminal domain and  
383 the random coil regions of pVHL, interface D has the lowest average algorithm score compared  
384 to the other binding interfaces (Figure 2C). Interface E consists of the C-terminal helix of pVHL;  
385 however, not much is known about its potential binding partners and its involvement in VHL

386 disease(8,32,63). Our data indicate that mutations occurring on interface E are less pathogenic,  
387 having a lower algorithm score than mutations occurring on binding surface A or B (Figure 2 C).  
388 Binding surfaces A, B, and C are involved in VCB complex formation, HIF, and Cul2 binding,  
389 respectively(8,32,61). Mutations that occur in this region are poised to interrupt the protein  
390 interactions crucial for HIF regulation, leading to tumor development. This is indicated by their  
391 higher average mutations scores of 11.5, 9.9, and 8.5 for surfaces A, B, and C, respectively  
392 (Figure 2C and Supplemental File 4). Mutations in binding interface A score significantly higher  
393 against all other interfaces, while B and C score significantly higher than the N-terminal  
394 interface D (Figure 2C and Supplemental File 4). These observations are consistent with the  
395 biological functions of these interfaces in the pathogenicity of VHL disease. Since these surfaces  
396 are involved in the formation of the E3 ubiquitin ligase complex, the higher algorithm scores are  
397 reflective of the potential dysfunction that result from mutations in these regions. pVHL  
398 functions to complex proteins together; therefore, mutations occurring on the surface of the  
399 protein, regardless of interface, should be more deleterious to overall function than mutations  
400 occurring towards the interior of the protein(33). Using a set of defined surface and deep  
401 mutations, our algorithmic approach scored surface mutations higher than deep mutations  
402 (Figure 2D). This is in agreement with other studies which found surface mutations to be at a  
403 higher risk of developing PCC(33).

404 VHL is an autosomal dominant hereditary disease putting patients at a lifelong risk of  
405 tumor development. Upon spontaneous mutation of the wild-type allele in susceptible tissue  
406 types, tumor development begins. A predictive outlook for the onset of VHL related cancers  
407 could provide clinicians with a more personalized surveillance strategy when provided with a  
408 unique mutation. Using data curated from the literature, our algorithm scored missense mutations

409 associated with an earlier age of onset for RA and ccRCC higher than those associated with a  
410 late age of onset (Figure 3C & D)(25,33). While, there was a trend towards higher algorithm  
411 scores for the early age of onset of PCC and CHB this was not statistically significant at the  $\alpha$ -  
412 value cut off of .05 (Figure 3A & B). Our multiparametric method scored W117 and L184, two  
413 residues identified as prone to highly destabilizing mutations, with high average scores of 12.84  
414 and 14.83, respectively (Table 1)(28). The approach outlined in this paper can identify mutations  
415 that are destabilizing, but this trend was not maintained for all mutations identified as VHL  
416 mutation hot spots, such as Y98 (Table 2)(32). Our multiparametric scoring algorithm evaluates  
417 the consequences of a missense mutation on the overall stability and folding dynamics of pVHL.  
418 Pathogenic mutations with lower algorithm scores, such as Y98, may serve a more direct role in  
419 protein-protein interactions or posttranslational modification, may be missed in our algorithm.  
420 However, it is interesting to speculate that biochemical studies on clinically identified hotspots  
421 that are scored lower in our algorithm, may reveal critical residues for VHL function not  
422 previously identified..

423 Additional clinical data will allow us to iteratively refine our algorithm approach. For  
424 example, some same-sense mutations can cause exon skipping in VHL, like the synonymous  
425 c.414A>G, p.Pro138Pro mutation(69,70). The dysregulation of splicing creates a truncated  
426 protein product consisting of exons 1 and 3. This deleterious variant of pVHL is unable to  
427 regulate HIF expression(69,70). For synonymous mutations such as c.414A>G, our algorithmic  
428 approach, would give this mutation an overall score of 1, as it can only alter the translation rate  
429 of the native codon. In exceptional cases as this clinical mutation, a more detailed understanding  
430 of the mechanism of exon skipping could inform future algorithmic approaches for the  
431 assessment of exon skipping risk in the *VHL* gene.

432           We have provided the first comprehensive multiparametric assessment of VHL missense  
433 mutations on the function of the VHL protein. Our platform provides the first steps to understand  
434 the phenotypic heterogeneity associated with missense mutations in pVHL. We anticipate that  
435 our algorithm can undergo iterative refinement as additional clinical data is made available, and  
436 the predictive capacity of our approach can be therefore be improved as additional research on  
437 VHL is available.

438 Author Contributions

439 Conceived and designed the experiments: FF NS SF SL. Performed the experiments: FF NS SF.

440 Analyzed the data: FF NS SF SL. Contributed reagents/materials/analysis tools: FF SF. Wrote

441 the paper: FF SF SL.

442

443

## 444 **References**

- 445 1. Gossage L, Eisen T, Maher ER. VHL, the story of a tumour suppressor gene [Internet].  
446 Vol. 15, Nature Reviews Cancer. 2015 [cited 2019 Sep 11]. p. 55–64. Available from:  
447 [www.nature.com/reviews/cancer](http://www.nature.com/reviews/cancer)
- 448 2. Haase V. The VHL Tumor Suppressor: Master Regulator of HIF. *Curr Pharm Des*  
449 [Internet]. 2009 [cited 2019 Oct 9];15(33):3895–903. Available from:  
450 <https://www.ncbi.nlm.nih.gov/pmc/articles/PMC3622710/pdf/nihms454216.pdf>
- 451 3. Latif F, Tory K, Gnarr J, Yao M, Duh FM, Orcutt M Lou, et al. Identification of the von  
452 Hippel-Lindau disease tumor suppressor gene. *Science* (80- ). 1993;260(5112):1317–20.
- 453 4. Tory K, Brauch H, Linehan M, Barba D, Oldfield E, Katz MF, et al. Specific genetic  
454 change in tumors associated with von hippel-lindau disease. *J Natl Cancer Inst* [Internet].  
455 1989 Jul 19 [cited 2019 Oct 10];81(14):1097–101. Available from:  
456 <https://academic.oup.com/jnci/article-lookup/doi/10.1093/jnci/81.14.1097>
- 457 5. Crossey PA, Foster K, Richards FM, Phipps ME, Latif F, Tory K, et al. Molecular genetic  
458 investigations of the mechanism of tumourigenesis in von Hippel-Lindau disease: analysis  
459 of allele loss in VHL tumours. *Hum Genet* [Internet]. 1994 Jan [cited 2019 Oct  
460 10];93(1):53–8. Available from: <http://www.ncbi.nlm.nih.gov/pubmed/8270255>
- 461 6. Iliopoulos O, Ohh M, Kaelin WG. pVHL19 is a biologically active product of the von  
462 Hippel-Lindau gene arising from internal translation initiation. *Proc Natl Acad Sci U S A*  
463 [Internet]. 1998 Sep 29 [cited 2019 Oct 10];95(20):11661–6. Available from:  
464 <http://www.ncbi.nlm.nih.gov/pubmed/9751722>
- 465 7. Blankenship C, Naglich JG, Whaley JM, Seizinger B, Kley N. Alternate choice of  
466 initiation codon produces a biologically active product of the von Hippel Lindau gene

- 467 with tumor suppressor activity. *Oncogene* [Internet]. 1999 Feb 8 [cited 2019 Oct  
468 10];18(8):1529–35. Available from: <http://www.nature.com/articles/1202473>
- 469 8. Tabaro F, Minervini G, Sundus F, Quaglia F, Leonardi E, Piovesan D, et al. VHLdb: A  
470 database of von Hippel-Lindau protein interactors and mutations OPEN. *Nat Publ Gr*  
471 [Internet]. 2016 [cited 2019 May 21]; Available from: [www.nature.com/scientificreports/](http://www.nature.com/scientificreports/)
- 472 9. Cardote TAF, Gadd MS, Ciulli A. Crystal Structure of the Cul2-Rbx1-EloBC-VHL  
473 Ubiquitin Ligase Complex. *Structure* [Internet]. 2017 Jun 6 [cited 2019 Oct 8];25(6):901-  
474 911.e3. Available from:  
475 <https://www.sciencedirect.com/science/article/pii/S0969212617301272?via%3Dihub>
- 476 10. Ohh M, Takagi Y, Aso T, Stebbins CE, Pavletich NP, Zbar B, et al. Synthetic peptides  
477 define critical contacts between elongin C, elongin B, and the von Hippel-Lindau protein.  
478 *J Clin Invest* [Internet]. 1999 Dec [cited 2019 Oct 8];104(11):1583–91. Available from:  
479 <http://www.ncbi.nlm.nih.gov/pubmed/10587522>
- 480 11. Stebbins CE, Kaelin WG, Pavletich NP. Structure of the VHL-elonginC-elonginB  
481 complex: Implications for VHL tumor suppressor function. *Science* (80- ) [Internet]. 1999  
482 Apr 16 [cited 2019 Oct 8];284(5413):455–61. Available from:  
483 <http://www.ncbi.nlm.nih.gov/pubmed/10205047>
- 484 12. Kibel A, Iliopoulos O, Decaprio JA, Jr WGK. Binding of the von Hippel-Lindau Tumor  
485 Suppressor Protein to Elongin B and C. *Science* (80- ). 1995;269(September):1444–7.
- 486 13. Ohh M, Park CW, Ivan M, Hoffman MA, Kim TY, Huang LE, et al. Ubiquitination of  
487 hypoxia-inducible factor requires direct binding to the  $\beta$ -domain of the von Hippel -  
488 Lindau protein. *Nat Cell Biol* [Internet]. 2000 Jul 9 [cited 2019 Oct 10];2(7):423–7.  
489 Available from: [http://www.nature.com/articles/ncb0700\\_423](http://www.nature.com/articles/ncb0700_423)

- 490 14. Iwai K, Yamanaka K, Kamura T, Minato N, Conaway RC, Conaway JW, et al.  
491 Identification of the von Hippel-Lindau tumor-suppressor protein as part of an active E3  
492 ubiquitin ligase complex. *Proc Natl Acad Sci U S A* [Internet]. 1999 [cited 2019 Oct  
493 10];96(22):12436–41. Available from: [www.pnas.org](http://www.pnas.org)
- 494 15. Lisztwan J, Imbert G, Wirbelauer C, Gstaiger M, Krek W. The von Hippel-Lindau tumor  
495 suppressor protein is a component of an E3 ubiquitin-protein ligase activity. *Genes Dev*  
496 [Internet]. 1999 Jul 15 [cited 2019 Oct 10];13(14):1822–33. Available from:  
497 <http://www.ncbi.nlm.nih.gov/pubmed/10421634>
- 498 16. Maxwell PH, Wlesener MS, Chang GW, Clifford SC, Vaux EC, Cockman ME, et al. The  
499 tumour suppressor protein VHL targets hypoxia-inducible factors for oxygen-dependent  
500 proteolysis. *Nature* [Internet]. 1999 May [cited 2019 Oct 11];399(6733):271–5. Available  
501 from: <http://www.nature.com/articles/20459>
- 502 17. Hon WC, Wilson MI, Harlos K, Claridge TDW, Schofield CJ, Pugh CW, et al. Structural  
503 basis for the recognition of hydroxyproline in HIF-1 $\alpha$  by pVHL. *Nature* [Internet]. 2002  
504 [cited 2019 May 29];417(6892):975–8. Available from: [www.nature.com/nature](http://www.nature.com/nature)
- 505 18. Knauth K, Bex C, Jemth P, Buchberger A. Renal cell carcinoma risk in type 2 von Hippel-  
506 Lindau disease correlates with defects in pVHL stability and HIF-1 $\alpha$  interactions.  
507 *Oncogene* [Internet]. 2006 Jan 31 [cited 2019 Oct 8];25(3):370–7. Available from:  
508 <http://www.nature.com/articles/1209062>
- 509 19. Rechsteiner MP, Von Teichman A, Nowicka A, Sulser T, Schraml P, Moch H. VHL gene  
510 mutations and their effects on hypoxia inducible factor HIF $\alpha$ : identification of potential  
511 driver and passenger mutations. *Cancer Res* [Internet]. 2011 [cited 2019 Sep  
512 13];71(16):5500–11. Available from: <http://cancerres.aacrjournals.org/>



- 513 20. Patard JJ, Rioux-Leclercq N, Masson D, Zerrouki S, Jouan F, Collet N, et al. Absence of  
514 VHL gene alteration and high VEGF expression are associated with tumour  
515 aggressiveness and poor survival of renal-cell carcinoma. *Br J Cancer* [Internet]. 2009  
516 [cited 2019 Oct 18];101(8):1417–24. Available from: [www.mhpa.com](http://www.mhpa.com).
- 517 21. Lonser RR, Glenn GM, Walther M, Chew EY, Libutti SK, Linehan WM, et al. von  
518 Hippel-Lindau disease. *Lancet* (London, England) [Internet]. 2003 Jun 14 [cited 2019 Oct  
519 11];361(9374):2059–67. Available from: <http://www.ncbi.nlm.nih.gov/pubmed/12814730>
- 520 22. Binderup MLM. Von Hippel-Lindau disease: Diagnosis and factors influencing disease  
521 outcome. *Dan Med J* [Internet]. 2018 [cited 2019 Oct 11];65(3):5461. Available from:  
522 [https://ugeskriftet.dk/files/scientific\\_article\\_files/2018-08/b5461.pdf](https://ugeskriftet.dk/files/scientific_article_files/2018-08/b5461.pdf)
- 523 23. Binderup MLM, Jensen AM, Budtz-Jørgensen E, Bisgaard ML. Survival and causes of  
524 death in patients with von Hippel-Lindau disease. *J Med Genet* [Internet]. 2017 Jan 1  
525 [cited 2019 Oct 11];54(1):11–8. Available from:  
526 <http://www.ncbi.nlm.nih.gov/pubmed/27539272>
- 527 24. Kai RO, Woodward ER, Killick P, Lim C, Macdonald F, Maher ER. Genotype-phenotype  
528 correlations in von Hippel-Lindau disease. *Hum Mutat*. 2007;28(2):143–9.
- 529 25. Peng S, Shepard MJ, Wang J, Li T, Ning X, Cai L, et al. Genotype-phenotype correlations  
530 in Chinese von Hippel-Lindau disease patients. *Oncotarget*. 2017;8(24):38456–65.
- 531 26. Gallou C, Chauveau D, Richard S, Joly D, Giraud S, Olschwang S, et al. Genotype-  
532 phenotype correlation in von Hippel-Lindau families with renal lesions. *Hum Mutat*  
533 [Internet]. 2004 Sep 1 [cited 2019 Sep 13];24(3):215–24. Available from:  
534 <http://doi.wiley.com/10.1002/humu.20082>
- 535 27. Liu SJ, Wang JY, Peng SH, Li T, Ning XH, Hong BA, et al. Genotype and phenotype

- 536 correlation in von Hippel–Lindau disease based on alteration of the HIF- $\alpha$  binding site in  
537 VHL protein. *Genet Med* [Internet]. 2018 Oct 29 [cited 2019 Sep 13];20(10):1266–73.  
538 Available from: <http://www.nature.com/articles/gim2017261>
- 539 28. Razafinjatovo C, Bihl S, Mischo A, Vogl U, Schmidinger M, Moch H, et al.  
540 Characterization of VHL missense mutations in sporadic clear cell renal cell carcinoma:  
541 Hotspots, affected binding domains, functional impact on pVHL and therapeutic  
542 relevance. *BMC Cancer* [Internet]. 2016 [cited 2019 Jun 17];16(1). Available from:  
543 <https://bmccancer.biomedcentral.com/track/pdf/10.1186/s12885-016-2688-0>
- 544 29. Landrum MJ, Lee JM, Benson M, Brown GR, Chao C, Chitipiralla S, et al. ClinVar:  
545 Improving access to variant interpretations and supporting evidence. *Nucleic Acids Res*  
546 [Internet]. 2018 Jan 4 [cited 2019 Oct 2];46(D1):D1062–7. Available from:  
547 <http://academic.oup.com/nar/article/46/D1/D1062/4641904>
- 548 30. Richards S, Aziz N, Bale S, Bick D, Das S, Gastier-Foster J, et al. Standards and  
549 guidelines for the interpretation of sequence variants: A joint consensus recommendation  
550 of the American College of Medical Genetics and Genomics and the Association for  
551 Molecular Pathology. *Genet Med*. 2015 May 8;17(5):405–24.
- 552 31. Ugrinov KG, Freed SD, Thomas CL, Lee SW. A multiparametric computational algorithm  
553 for comprehensive assessment of genetic mutations in mucopolysaccharidosis type IIIA  
554 (Sanfilippo Syndrome). *PLoS One* [Internet]. 2015 [cited 2019 May 20];10(3):121511.  
555 Available from: [www.hgmd.cf.ac.uk](http://www.hgmd.cf.ac.uk)
- 556 32. Minervini G, Quaglia F, Tabaro F, Tosatto SCE. Genotype-phenotype relations of the von  
557 hippel-lindau tumor suppressor inferred from a large-scale analysis of disease mutations  
558 and interactors. *PLoS Comput Biol* [Internet]. 2019 [cited 2019 May 20];15(4). Available

- 559 from: <https://doi.org/10.1371/journal.pcbi.1006478>
- 560 33. Kai RO, Woodward ER, Killick P, Lim C, Macdonald F, Maher ER. Genotype-phenotype  
561 correlations in von Hippel-Lindau disease. *Hum Mutat* [Internet]. 2007 Feb [cited 2019  
562 Sep 13];28(2):143–9. Available from: <http://doi.wiley.com/10.1002/humu.20385>
- 563 34. Gallou C, Chauveau D, Richard S, Joly D, Giraud S, Olschwang S, et al. Genotype-  
564 phenotype correlation in von Hippel-Lindau families with renal lesions. *Hum Mutat*.  
565 2004;24(3):215–24.
- 566 35. Stebbins CE, Jr WGK, Pavletich NP. Structure of the Complex : Implications for VHL  
567 Tumor Suppressor Function. *Science* (80- ). 2009;455(1999):455–62.
- 568 36. Min JH, Yang H, Ivan M, Gertler F, Kaelin WG, Pavietich NP. Structure of an HIF-1 $\alpha$ -  
569 pVHL complex: Hydroxyproline recognition in signaling. *Science* (80- ) [Internet]. 2002  
570 Jun 7 [cited 2019 Oct 8];296(5574):1886–9. Available from:  
571 <http://www.sciencemag.org/cgi/doi/10.1126/science.1073440>
- 572 37. Yang J, Zhang Y. Protein Structure and Function Prediction Using I-TASSER. *Curr*  
573 *Protoc Bioinforma* [Internet]. 2015 [cited 2019 May 29];52:5.8.1-5.8.15. Available from:  
574 <http://zhanglab.ccmb.med.umich.edu/I-TASSER/download/>.
- 575 38. Conchillo-Solé O, de Groot NS, Avilés FX, Vendrell J, Daura X, Ventura S.  
576 AGGRESKAN: A server for the prediction and evaluation of “hot spots” of aggregation in  
577 polypeptides. *BMC Bioinformatics* [Internet]. 2007 Feb 27 [cited 2019 Oct 3];8(1):65.  
578 Available from: [http://bmcbioinformatics.biomedcentral.com/articles/10.1186/1471-2105-](http://bmcbioinformatics.biomedcentral.com/articles/10.1186/1471-2105-8-65)  
579 [8-65](http://bmcbioinformatics.biomedcentral.com/articles/10.1186/1471-2105-8-65)
- 580 39. Hon WC, Wilson MI, Harlos K, Claridge TDW, Schofield CJ, Pugh CW, et al. Structural  
581 basis for the recognition of hydroxyproline in HIF-1 $\alpha$  by pVHL. *Nature* [Internet]. 2002

- 582 Jun 5 [cited 2019 Oct 8];417(6892):975–8. Available from:  
583 <http://www.nature.com/articles/nature00767>
- 584 40. Teilum K, Olsen JG, Kragelund BB. Functional aspects of protein flexibility [Internet].  
585 Vol. 66, Cellular and Molecular Life Sciences. SP Birkhäuser Verlag Basel; 2009 [cited  
586 2019 Oct 3]. p. 2231–47. Available from: [http://link.springer.com/10.1007/s00018-009-](http://link.springer.com/10.1007/s00018-009-0014-6)  
587 [0014-6](http://link.springer.com/10.1007/s00018-009-0014-6)
- 588 41. Vanhoof G, Goossens F, De Meester I, Hendriks D, Scharpe S. Proline motifs in peptides  
589 and their biological processing [Internet]. Vol. 9, FASEB Journal. 1995 [cited 2019 Oct  
590 3]. p. 736–44. Available from: <http://www.ncbi.nlm.nih.gov/pubmed/7601338>
- 591 42. Yaron A, Naider F, Scharpe S. Proline-dependent structural and biological properties of  
592 peptides and proteins. Crit Rev Biochem Mol Biol [Internet]. 1993 Jan 26 [cited 2019 Oct  
593 3];28(1):31–81. Available from:  
594 <http://www.tandfonline.com/doi/full/10.3109/10409239309082572>
- 595 43. Nick Pace C, Martin Scholtz J. A Helix Propensity Scale Based on Experimental Studies  
596 of Peptides and Proteins. Biophys J [Internet]. 1998 Jul [cited 2019 Oct 3];75(1):422–7.  
597 Available from: <http://www.ncbi.nlm.nih.gov/pubmed/9649402>
- 598 44. Minor DL, Kim PS. Measurement of the  $\beta$ -sheet-forming propensities of amino acids.  
599 Nature [Internet]. 1994 Feb [cited 2019 Oct 3];367(6464):660–3. Available from:  
600 <http://www.nature.com/articles/367660a0>
- 601 45. Narayan M. Disulfide bonds: protein folding and subcellular protein trafficking. FEBS J  
602 [Internet]. 2012 Jul 1 [cited 2019 Oct 3];279(13):2272–82. Available from:  
603 <http://doi.wiley.com/10.1111/j.1742-4658.2012.08636.x>
- 604 46. Pechmann S, Levy ED, Tartaglia GG, Vendruscolo M. Physicochemical principles that

- 605 regulate the competition between functional and dysfunctional association of proteins.  
606 Proc Natl Acad Sci U S A [Internet]. 2009 [cited 2019 Oct 3];106(25):10159–64.  
607 Available from: <https://www.pnas.org/content/pnas/106/25/10159.full.pdf>
- 608 47. Dill KA. Dominant Forces in Protein Folding. Biochemistry [Internet]. 1990 Aug 7 [cited  
609 2019 Oct 7];29(31):7133–55. Available from:  
610 <https://pubs.acs.org/doi/abs/10.1021/bi00483a001>
- 611 48. Kumar S, Nussinov R. Close-range electrostatic interactions in proteins [Internet]. Vol. 3,  
612 ChemBioChem. John Wiley & Sons, Ltd; 2002 [cited 2019 Oct 7]. p. 604–17. Available  
613 from: [http://doi.wiley.com/10.1002/1439-](http://doi.wiley.com/10.1002/1439-7633%2820020703%293%3A7%3C604%3A%3AAID-CBIC604%3E3.0.CO%3B2-X)  
614 [7633%2820020703%293%3A7%3C604%3A%3AAID-CBIC604%3E3.0.CO%3B2-X](http://doi.wiley.com/10.1002/1439-7633%2820020703%293%3A7%3C604%3A%3AAID-CBIC604%3E3.0.CO%3B2-X)
- 615 49. Gromiha MM. Prediction of protein stability upon point mutations. In: Biochemical  
616 Society Transactions [Internet]. 2007 [cited 2019 May 25]. p. 1569–73. Available from:  
617 <http://cupsat.uni-koeln.de>.
- 618 50. Plaza Del Pino IM, Ibarra-Molero B, Sanchez-Ruiz JM. Lower kinetic limit to protein  
619 thermal stability: A proposal regarding protein stability in vivo and its relation with  
620 misfolding diseases. Proteins Struct Funct Genet. 2000;40(1):58–70.
- 621 51. Clark PL. Protein folding in the cell: Reshaping the folding funnel. Trends Biochem Sci.  
622 2004;
- 623 52. Baker1 D, Agard DA. Perspectives in Biochemistry Kinetics versus Thermodynamics in  
624 Protein Folding [Internet]. Vol. 33, Biochemistry. 1994 [cited 2019 Nov 7]. Available  
625 from: <https://pubs.acs.org/sharingguidelines>
- 626 53. Dill KA, Ozkan SB, Scott Shell M, Weikl TR. The Protein Folding Problem.
- 627 54. Sanchez-Ruiz JM. Protein kinetic stability. Biophysical Chemistry. 2010.

- 628 55. Duan G, Walther D. The Roles of Post-translational Modifications in the Context of  
629 Protein Interaction Networks. *PLoS Comput Biol* [Internet]. 2015 [cited 2019 Nov  
630 8];11(2):1004049. Available from: <http://www.uniprot.org/docs/ptmlist>
- 631 56. Huang JX, Lee G, Cavanaugh KE, Chang JW, Gardel ML, Moellering RE. High  
632 throughput discovery of functional protein modifications by Hotspot Thermal Profiling.  
633 [cited 2019 Nov 8]; Available from: <https://doi.org/10.1038/s41592-019-0499-3>
- 634 57. Basak S, Lu C, Basak A. Post-Translational Protein Modifications of Rare and  
635 Unconventional Types: Implications in Functions and Diseases. *Curr Med Chem*  
636 [Internet]. 2016 Mar 15 [cited 2019 Nov 8];23(7):714–45. Available from:  
637 [http://www.eurekaselect.com/openurl/content.php?genre=article&issn=0929-  
638 8673&volume=23&issue=7&spage=714](http://www.eurekaselect.com/openurl/content.php?genre=article&issn=0929-8673&volume=23&issue=7&spage=714)
- 639 58. Tsai CJ, Sauna ZE, Kimchi-Sarfaty C, Ambudkar S V., Gottesman MM, Nussinov R.  
640 Synonymous Mutations and Ribosome Stalling Can Lead to Altered Folding Pathways  
641 and Distinct Minima [Internet]. Vol. 383, *Journal of Molecular Biology*. Academic Press;  
642 2008 [cited 2019 Oct 3]. p. 281–91. Available from:  
643 <https://www.sciencedirect.com/science/article/pii/S0022283608009923?via%3Dihub>
- 644 59. Clarke IV TF, Clark PL. Increased incidence of rare codon clusters at 5' and 3' gene  
645 termini: Implications for function. *BMC Genomics* [Internet]. 2010 Feb 18 [cited 2019  
646 Oct 3];11(1):118. Available from:  
647 <http://bmcgenomics.biomedcentral.com/articles/10.1186/1471-2164-11-118>
- 648 60. Chan PP, Lowe TM. GtRNAdb 2.0: An expanded database of transfer RNA genes  
649 identified in complete and draft genomes. *Nucleic Acids Res* [Internet]. 2016 Jan 4 [cited  
650 2019 Oct 7];44(D1):D184–9. Available from: <https://academic.oup.com/nar/article->

- 651 lookup/doi/10.1093/nar/gkv1309
- 652 61. Minervini G, Mazzotta GM, Masiero A, Sartori E, Corrà S, Potenza E, et al. Isoform-  
653 specific interactions of the von Hippel-Lindau tumor suppressor protein. *Sci Rep*  
654 [Internet]. 2015;5:1–9. Available from: <http://dx.doi.org/10.1038/srep12605>
- 655 62. Minervini G, Panizzoni E, Giollo M, Masiero A, Ferrari C, Tosatto SCE, et al. Design and  
656 Analysis of a Petri Net Model of the Von Hippel-Lindau (VHL) Tumor Suppressor  
657 Interaction Network. 2014 [cited 2019 May 23]; Available from: [www.plosone.org](http://www.plosone.org)
- 658 63. Tsuchiya H, Iseda T, Hino O. Identification of a novel protein (VBP-1) binding to the von  
659 Hippel-Lindau (VHL) tumor suppressor gene product. *Cancer Res* [Internet]. 1996 Jul 1  
660 [cited 2019 Oct 9];56(13):2881–5. Available from:  
661 <http://www.ncbi.nlm.nih.gov/pubmed/8674032>
- 662 64. Bader HL, Hsu T. Systemic VHL gene functions and the VHL disease. *FEBS Lett*  
663 [Internet]. 2012;586(11):1562–9. Available from:  
664 <http://dx.doi.org/10.1016/j.febslet.2012.04.032>
- 665 65. Metelo AM, Noonan HR, Xiang L, Jin Y, Baker R, Kamentsky L, et al. Pharmacological  
666 HIF2 $\alpha$  inhibition improves VHL disease-associated phenotypes in zebrafish model. *J Clin*  
667 *Invest* [Internet]. 2015 [cited 2019 Jun 1];125(5):1987–97. Available from:  
668 [https://dm5migu4zj3pb.cloudfront.net/manuscripts/73000/73665/cache/73665.3-  
669 20150521135435-covered-253bed37ca4c1ab43d105aefdf7b5536.pdf](https://dm5migu4zj3pb.cloudfront.net/manuscripts/73000/73665/cache/73665.3-20150521135435-covered-253bed37ca4c1ab43d105aefdf7b5536.pdf)
- 670 66. Knauth K, Bex C, Jemth P, Buchberger A. Renal cell carcinoma risk in type 2 von Hippel-  
671 Lindau disease correlates with defects in pVHL stability and HIF-1 $\alpha$  interactions.  
672 *Oncogene* [Internet]. 2006 [cited 2019 Nov 9];25:370–7. Available from:  
673 [www.nature.com/onc](http://www.nature.com/onc)

- 674 67. Maher ER, Iselius L, Yates JRW, Littler M, Benjamin C, Harris R, et al. Von Hippel-  
675 Lindau disease: A genetic study. *J Med Genet* [Internet]. 1991 Jul 1 [cited 2019 Oct  
676 14];28(7):443–7. Available from: <http://www.ncbi.nlm.nih.gov/pubmed/1895313>
- 677 68. Neumann HPH, Wiestler OD. Clustering of features of von Hippel-Lindau syndrome:  
678 evidence for a complex genetic locus. *Lancet* [Internet]. 1991 May 4 [cited 2019 Oct  
679 14];337(8749):1052–4. Available from:  
680 <https://www.sciencedirect.com/science/article/pii/014067369191705Y?via%3Dihub>
- 681 69. Flores SK, Cheng Z, Jasper AM, Natori K, Okamoto T, Tanabe A, et al. Synonymous but  
682 Not Silent: A Synonymous VHL Variant in Exon 2 Confers Susceptibility to Familial  
683 Pheochromocytoma and von Hippel-Lindau Disease. *J Clin Endocrinol Metab* [Internet].  
684 2019 [cited 2019 Sep 3];104(9):3826–34. Available from:  
685 <https://academic.oup.com/jcem/article-abstract/104/9/3826/5426809>
- 686 70. Lenglet M, Robriquet F, Schwarz K, Camps C, Couturier A, Hoogewijs D, et al.  
687 Identification of a new VHL exon and complex splicing alterations in familial  
688 erythrocytosis or von Hippel-Lindau disease. *Blood*. 2018;132(5):469–83.  
689



Fig 1

A.

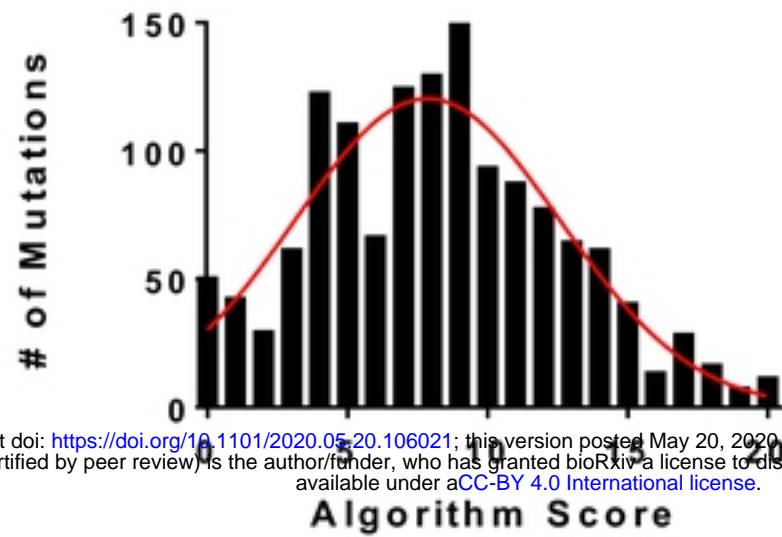

B.

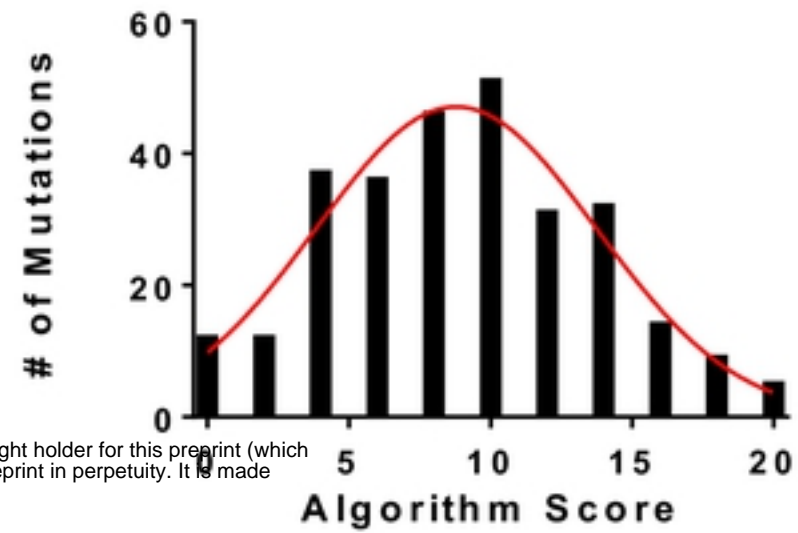

C.

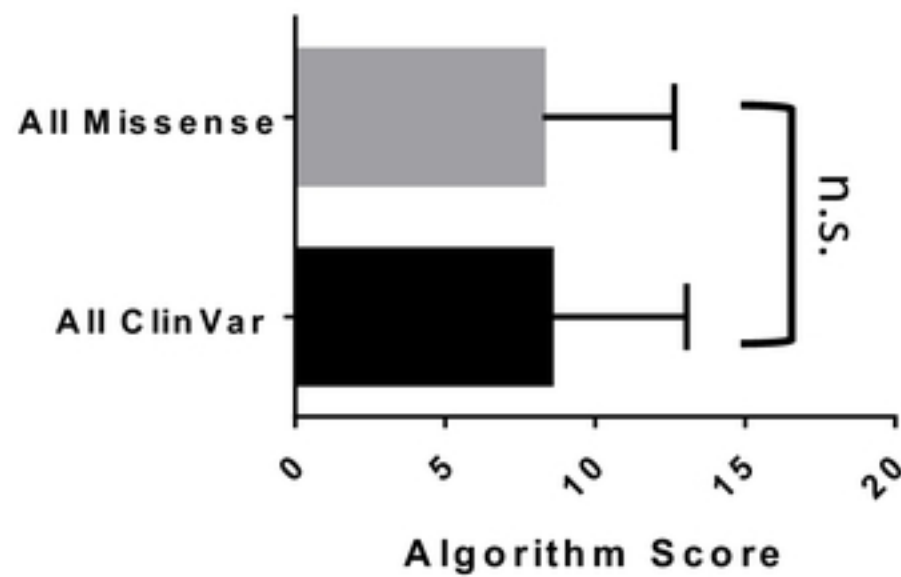

D.

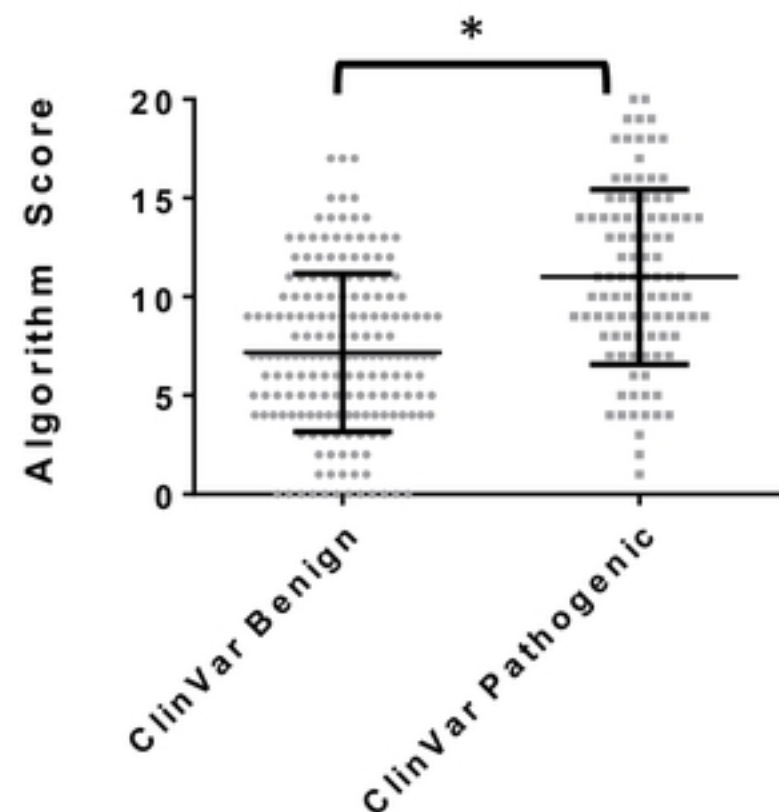

**Figure 1:** Score distributions for the VHL missense mutations used in the multiparametric approach. **A.** A fitted Gaussian distribution (red) of scores for all 1379 possible missense mutations from a SNP in VHL **B.** A fitted Gaussian distribution (red) of scores for the 285 ClinVar missense mutations used in this study. **C.** Relationship between the All Mutation data set and the ClinVar data set. **D.** Mutation algorithm scores plotted according to their ClinVar pathogenicity. Each dot is a mutation. All error bars represent the standard deviation. A \* represents a  $P < .05$  according to a Kolmogorov Smirnov test. All statistics done in Graph Pad Prism.

Fig 2

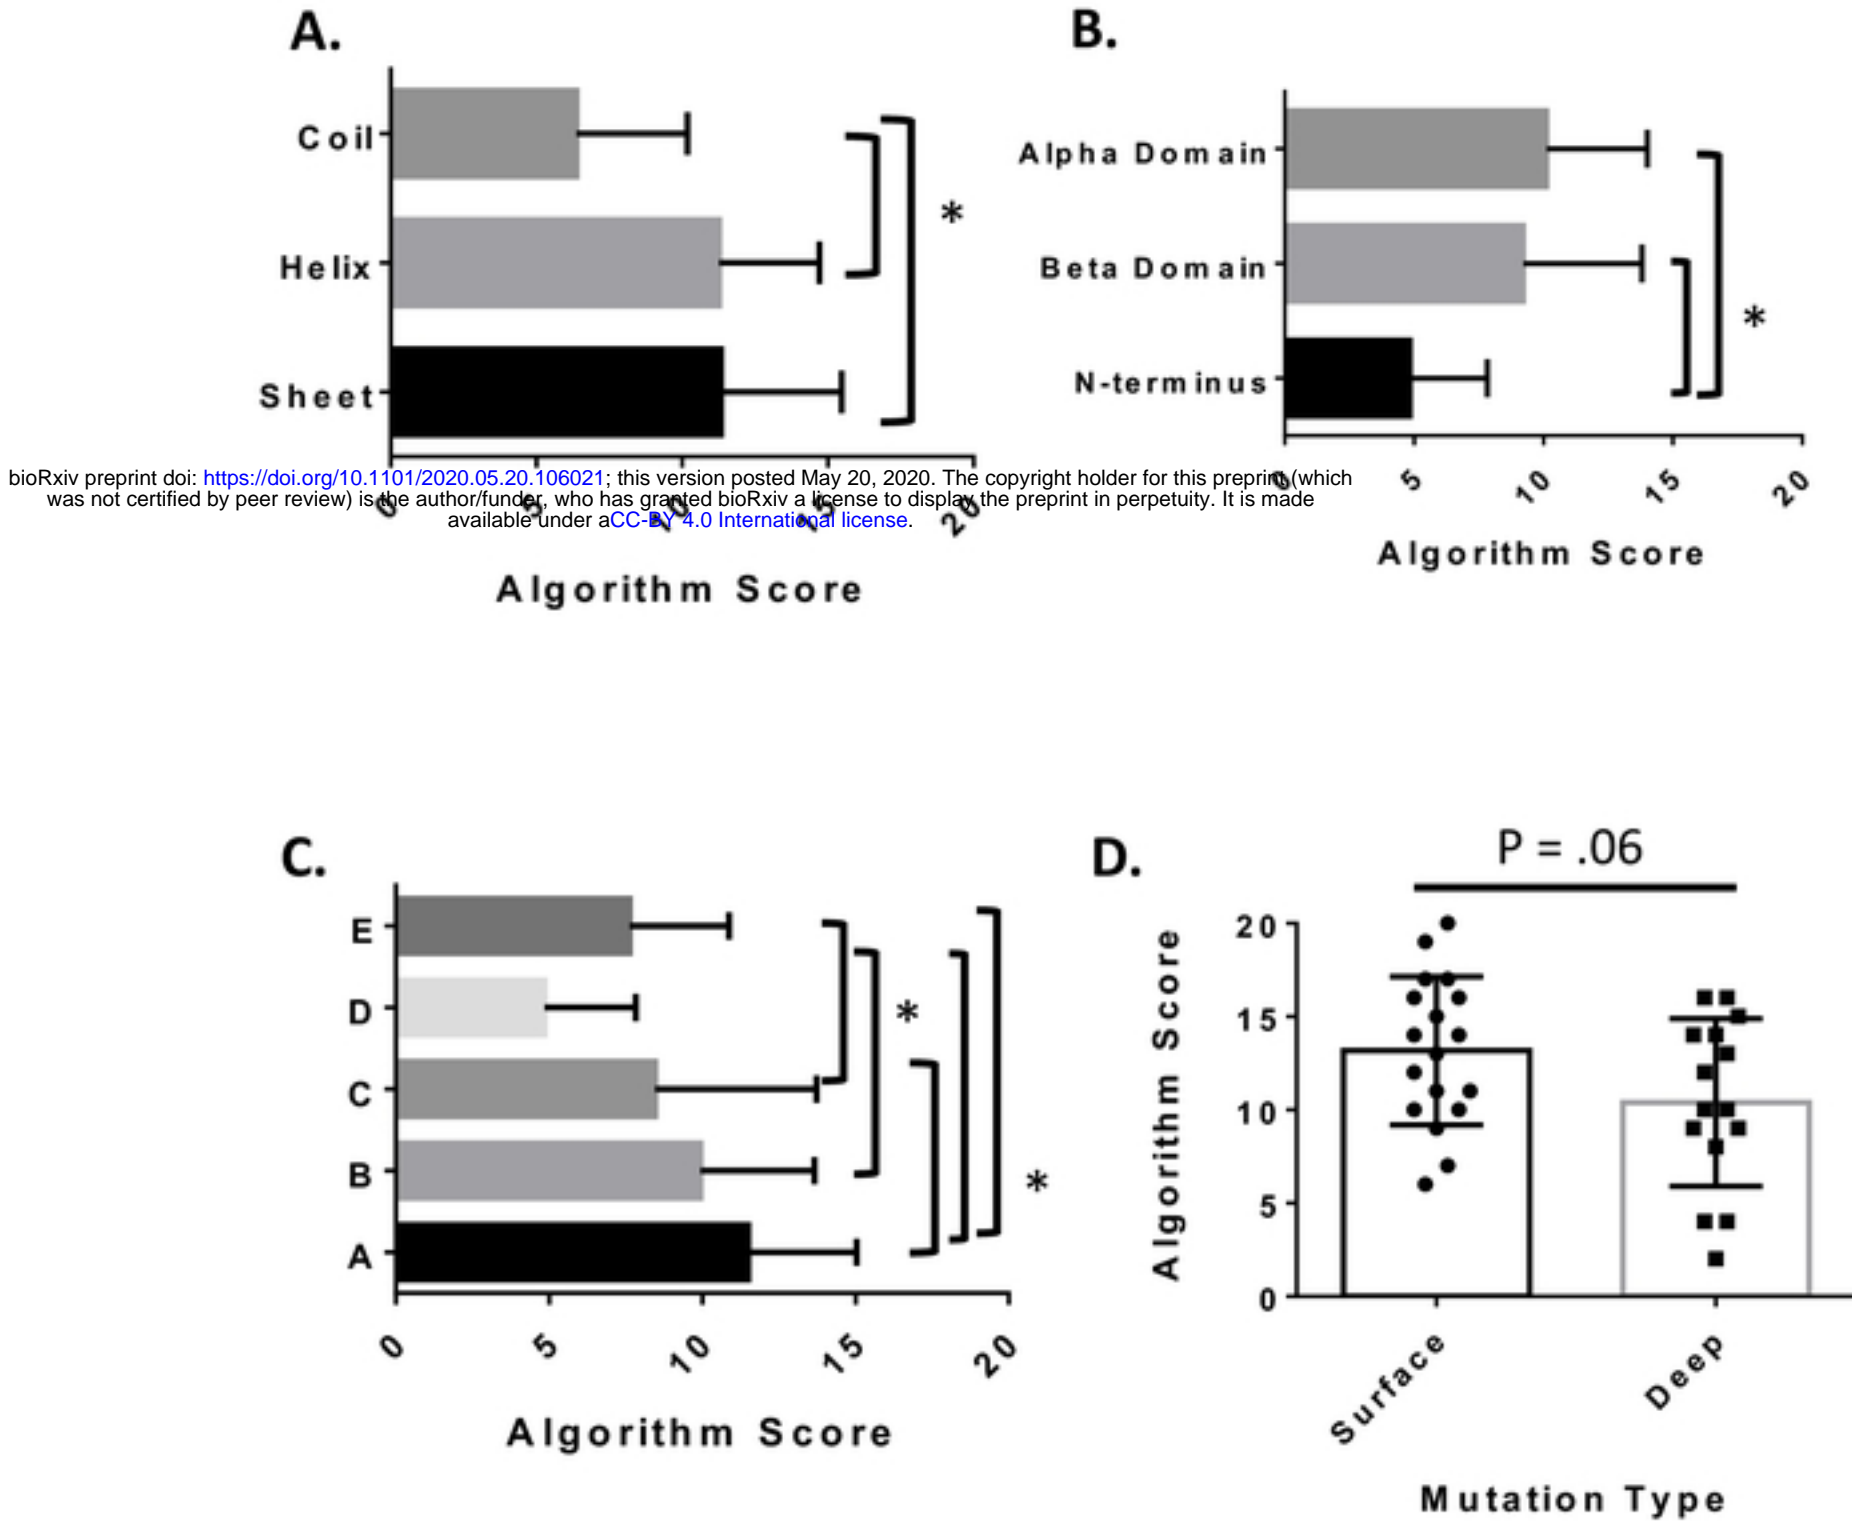

**Figure 2:** Association of missense mutation algorithm score to its spatial distribution on pVHL. **A.** Algorithm scores for mutations according to secondary structure. **B.** pVHL domain **C.** or pVHL binding interfaces. Significance was determined using an ANOVA or Kruskal-Wallis test and followed up with Tukey HSD or Dunn's MCT as appropriate. Error bars represent the standard deviation. \* represents a significant difference with a  $p < .05$ . **D.** Algorithm Score for mutations according to their depth within the structure of VHL. Each dot is a mutation. Error bars represent the standard deviation. \* represents a significant difference with a  $p < .05$  as determined by Student's t-test. All statistics were done using GraphPad Prism.

439  
440

Fig 3

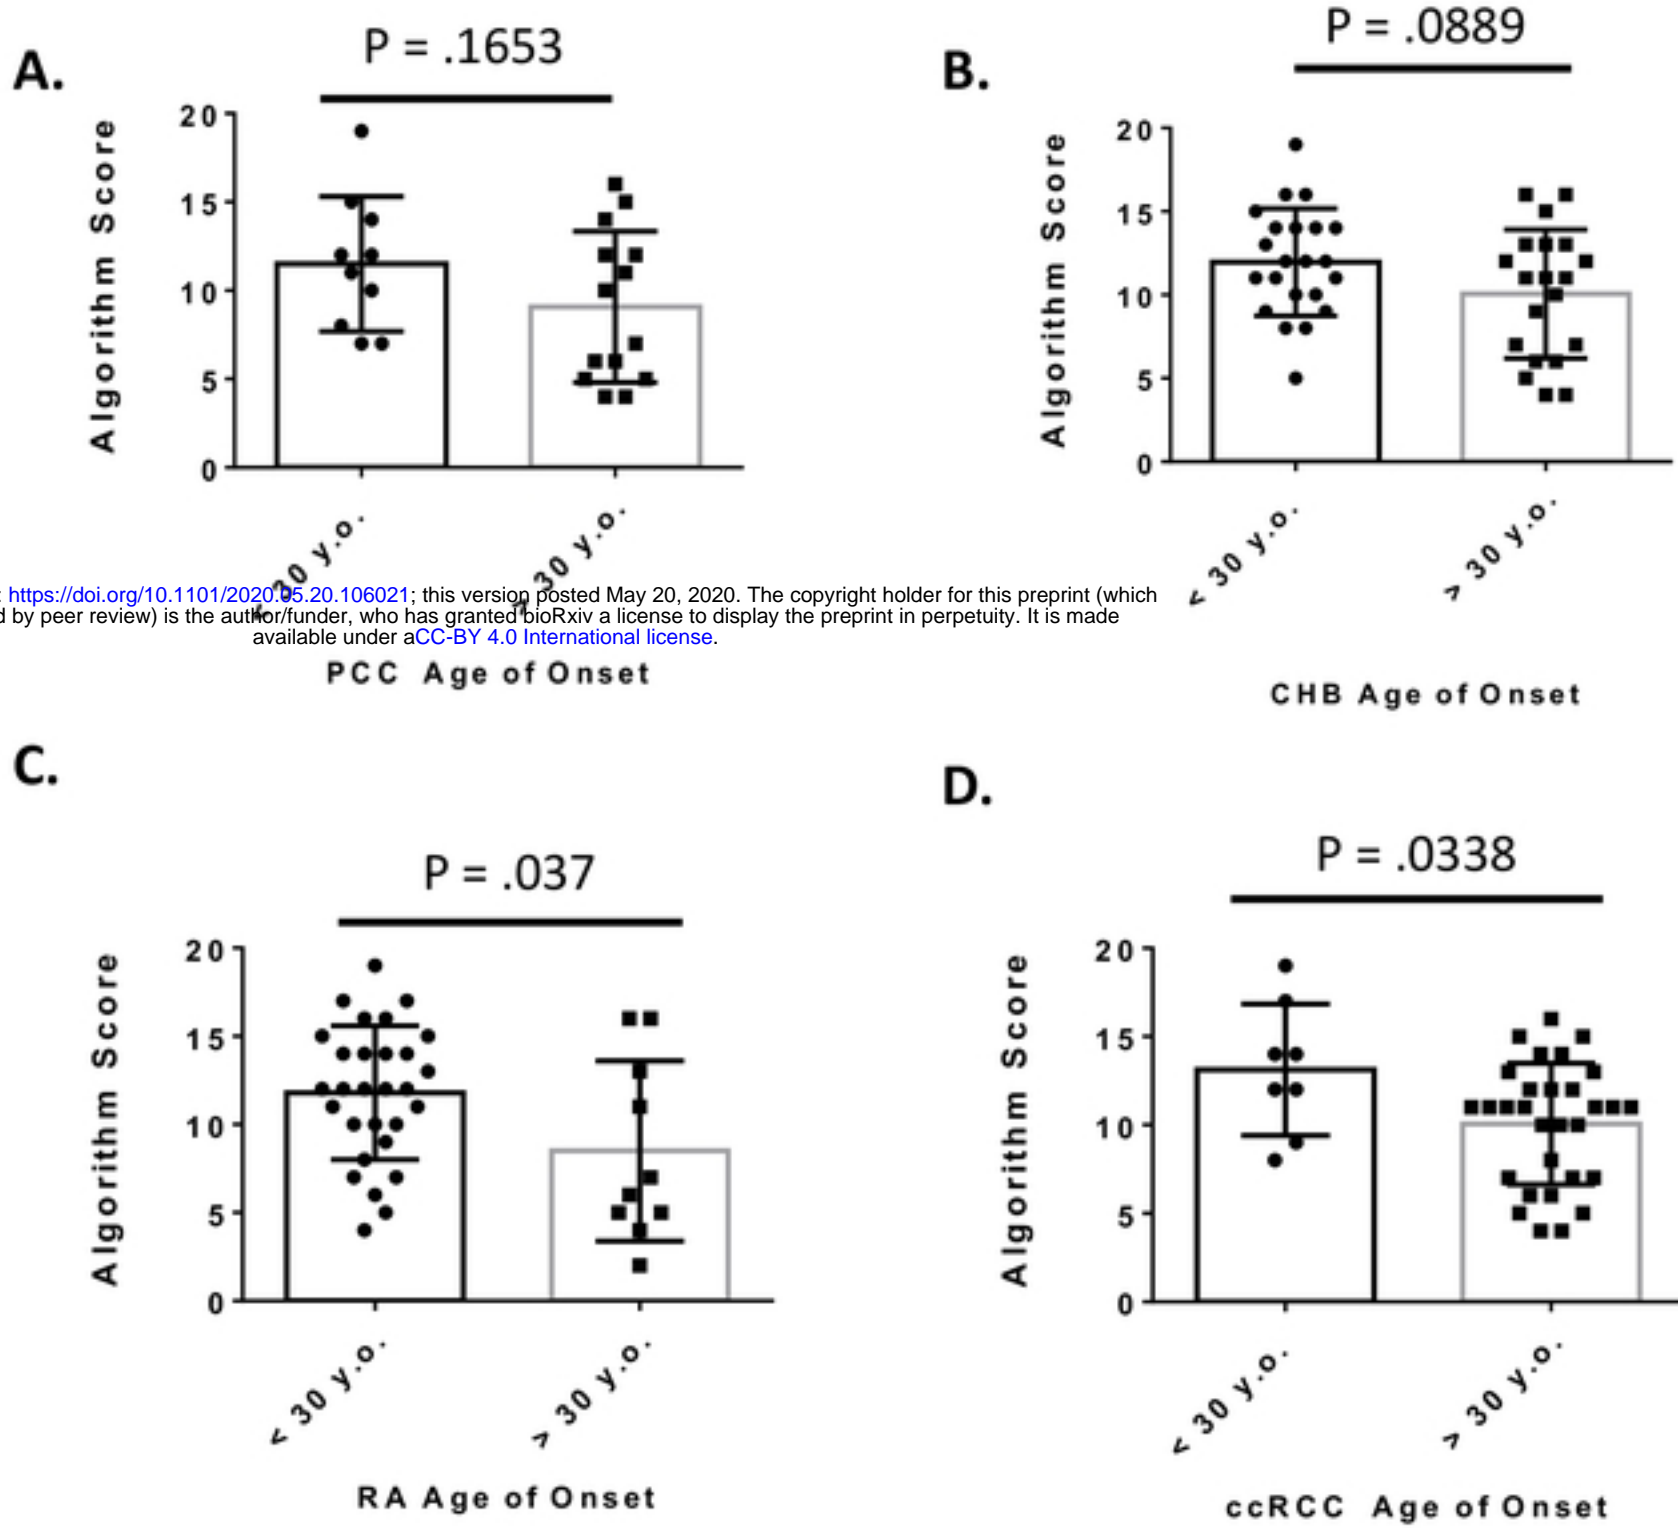

bioRxiv preprint doi: <https://doi.org/10.1101/2020.05.20.106021>; this version posted May 20, 2020. The copyright holder for this preprint (which was not certified by peer review) is the author/funder, who has granted bioRxiv a license to display the preprint in perpetuity. It is made available under aCC-BY 4.0 International license.

**Figure 3:** VHL missense mutations algorithm scores associated with onset of the VHL related cancers: **A.** pheochromocytoma (PCC) **B.** central nervous system hemangioblastoma (CHB) **C.** retinal angioma (RA) and **D.** clear cell renal carcinoma (ccRCC). Each dot is the average age of onset for a missense mutation. Error bars represent the standard deviation. P-values were determined using Student's t-test.

Table 1

| Mutation | P1: Aggregation Propensity | P2: Protein-Protein Interactions | P3: Secondary Structure | P4: Conformational Flexibility | P5: Solvent Accessibility | P6: Protein Stability | P7: Post-translational Modifications | P8: Translation Rate | Total Score | Average Score | Standard Deviation |
|----------|----------------------------|----------------------------------|-------------------------|--------------------------------|---------------------------|-----------------------|--------------------------------------|----------------------|-------------|---------------|--------------------|
| W117R    | 0                          | 4                                | 4                       | 0                              | 3                         | 0                     | 0                                    | 0                    | 11          | 12.86         | 1.77               |
| W117R    | 0                          | 4                                | 4                       | 0                              | 3                         | 0                     | 0                                    | 0                    | 11          |               |                    |
| W117G    | 0                          | 4                                | 4                       | 0                              | 0                         | 4                     | 0                                    | 0                    | 12          |               |                    |
| W117S    | 0                          | 4                                | 4                       | 0                              | 0                         | 4                     | 0                                    | 0                    | 12          |               |                    |
| W117L    | 2                          | 4                                | 4                       | 0                              | 0                         | 4                     | 0                                    | 0                    | 14          |               |                    |
| W117C    | 0                          | 4                                | 4                       | 2                              | 0                         | 4                     | 0                                    | 1                    | 15          |               |                    |
| W117K    | 0                          | 4                                | 4                       | 2                              | 0                         | 4                     | 0                                    | 1                    | 15          |               |                    |
| W117E    | 0                          | 4                                | 4                       | 0                              | 0                         | 4                     | 0                                    | 1                    | 13          |               |                    |
| W117D    | 0                          | 4                                | 4                       | 0                              | 0                         | 4                     | 0                                    | 1                    | 12          |               |                    |
| W117N    | 0                          | 4                                | 4                       | 0                              | 0                         | 4                     | 0                                    | 0                    | 14          |               |                    |
| L184I    | 0                          | 4                                | 4                       | 0                              | 0                         | 4                     | 0                                    | 0                    | 15          | 14.83         | 2.32               |
| L184V    | 0                          | 4                                | 4                       | 0                              | 0                         | 4                     | 0                                    | 0                    | 14          |               |                    |
| L184F    | 0                          | 4                                | 4                       | 2                              | 0                         | 4                     | 0                                    | 0                    | 15          |               |                    |
| L184H    | 0                          | 4                                | 4                       | 0                              | 3                         | 4                     | 0                                    | 0                    | 15          |               |                    |
| L184P    | 0                          | 4                                | 4                       | 2                              | 3                         | 4                     | 0                                    | 1                    | 18          |               |                    |
| L184R    | 0                          | 4                                | 4                       | 2                              | 3                         | 4                     | 0                                    | 0                    | 17          |               |                    |

Algorithm Scores for All Possible Missense Mutations at Highly Destabilizing Residues

bioRxiv preprint doi: <https://doi.org/10.1101/2020.05.20.106021>; this version posted May 20, 2020. The copyright holder for this preprint (which was not certified by peer review) is the author/funder, who has granted bioRxiv a license to display the preprint in perpetuity. It is made available under aCC-BY 4.0 International license.

**Table 1:** All possible missense mutations at highly destabilizing residues and their corresponding algorithm scores.

Table 2

**Algorithm Scores for All Possible Missense Mutations at VHL Mutation Hot Spots**

| Mutation | P1: Aggregation Propensity | P2: Protein Protein Interactions | P3: Secondary Structure | P4: Conformational Flexibility | P5: Solvent Accessibility | P6: Protein Stability | P7: Post-translational Modifications | P8: Translation Rate | Total Score | Average Hot Spot Score | Standard Deviation |
|----------|----------------------------|----------------------------------|-------------------------|--------------------------------|---------------------------|-----------------------|--------------------------------------|----------------------|-------------|------------------------|--------------------|
| R167W    | 0                          | 0                                | 4                       | 0                              | 3                         | 0                     | 0                                    | 0                    | 7           |                        |                    |
| R167L    | 2                          | 0                                | 4                       | 0                              | 3                         | 0                     | 0                                    | 0                    | 9           |                        |                    |
| R167P    | 0                          | 0                                | 4                       | 2                              | 3                         | 0                     | 0                                    | 0                    | 9           | 9.60                   | 1.95               |
| R167G    | 0                          | 0                                | 4                       | 0                              | 3                         | 4                     | 0                                    | 1                    | 12          |                        |                    |
| R167Q    | 0                          | 0                                | 4                       | 0                              | 3                         | 4                     | 0                                    | 0                    | 11          |                        |                    |
| L158Q    | 0                          | 4                                | 4                       | 0                              | 0                         | 0                     | 0                                    | 1                    | 9           |                        |                    |
| L158R    | 0                          | 4                                | 4                       | 2                              | 3                         | 0                     | 0                                    | 0                    | 13          |                        |                    |
| L158M    | 0                          | 4                                | 4                       | 0                              | 0                         | 4                     | 0                                    | 0                    | 12          | 13.00                  | 3.24               |
| L156V    | 0                          | 4                                | 4                       | 0                              | 0                         | 4                     | 0                                    | 1                    | 13          |                        |                    |
| L156P    | 0                          | 4                                | 4                       | 2                              | 3                         | 4                     | 0                                    | 1                    | 18          |                        |                    |
| N785     | 0                          | 4                                | 4                       | 0                              | 0                         | 4                     | 0                                    | 0                    | 12          |                        |                    |
| N78T     | 0                          | 4                                | 4                       | 0                              | 0                         | 4                     | 0                                    | 1                    | 13          |                        |                    |
| N78D     | 0                          | 4                                | 4                       | 0                              | 3                         | 4                     | 0                                    | 1                    | 16          |                        |                    |
| N78H     | 0                          | 4                                | 4                       | 0                              | 3                         | 4                     | 0                                    | 1                    | 16          |                        |                    |
| N78I     | 2                          | 4                                | 4                       | 0                              | 3                         | 4                     | 0                                    | 1                    | 18          | 16.25                  | 2.55               |
| N78K     | 0                          | 4                                | 4                       | 2                              | 3                         | 4                     | 0                                    | 1                    | 18          |                        |                    |
| N78K     | 0                          | 4                                | 4                       | 2                              | 3                         | 4                     | 0                                    | 1                    | 18          |                        |                    |
| N78Y     | 2                          | 4                                | 4                       | 2                              | 3                         | 4                     | 0                                    | 0                    | 19          |                        |                    |
| Y98S     | 0                          | 4                                | 0                       | 0                              | 0                         | 0                     | 0                                    | 1                    | 5           |                        |                    |
| Y98C     | 0                          | 4                                | 0                       | 2                              | 0                         | 0                     | 0                                    | 1                    | 7           |                        |                    |
| Y98D     | 0                          | 4                                | 0                       | 0                              | 3                         | 0                     | 0                                    | 0                    | 7           | 6.83                   | 0.98               |
| Y98H     | 0                          | 4                                | 0                       | 0                              | 3                         | 0                     | 0                                    | 0                    | 7           |                        |                    |
| Y98N     | 0                          | 4                                | 0                       | 0                              | 3                         | 0                     | 0                                    | 0                    | 7           |                        |                    |
| Y98F     | 0                          | 4                                | 0                       | 0                              | 0                         | 4                     | 0                                    | 0                    | 8           |                        |                    |

bioRxiv preprint doi: <https://doi.org/10.1101/2020.05.20.106021>; this version posted May 20, 2020. The copyright holder for this preprint (which was not certified by peer review) is the author/funder, who has granted bioRxiv a license to display the preprint in perpetuity. It is made available under aCC-BY 4.0 International license.

**Table 2:** All possible missense mutations at VHL disease associated mutation hot spots and their corresponding algorithm scores.
